# Supplementary material
Source: PubMed Central journal article supplement (PMC4394253)
Supplement: pnas.1500973112.sapp.pdf [file pnas.1500973112.sapp.pdf]

## Supporting Information

### TCR contact residue hydrophobicity is a hallmark of immunogenic CD8<sup>+</sup> T cell epitopes

Diego Chowell<sup>a,b,1</sup>, Sri Krishna<sup>b,d,1</sup>, Pablo D. Becker<sup>e</sup>, Clément Cocita<sup>e</sup>, Jack Shu<sup>f</sup>, Xuefang Tan<sup>f</sup>, Philip D. Greenberg<sup>f</sup>, Linda S. Klavinskis<sup>e,2</sup>, Joseph N. Blattman<sup>c,2</sup>, and Karen S. Anderson<sup>b,2</sup>

<sup>a</sup>Simon A. Levin Mathematical, Computational and Modeling Sciences Center, <sup>b</sup>Center for Personalized Diagnostics, <sup>c</sup>Center for Infectious Diseases and Vaccinology, and <sup>d</sup>School of Biological and Health Systems Engineering, Arizona State University, Tempe, AZ 85004; <sup>e</sup>Department of Immunobiology, King's College London, London SE1 9RT, United Kingdom; and <sup>f</sup>Department of Immunology, University of Washington, Seattle, WA 98195.

<sup>1</sup>These authors contributed equally to this work.

<sup>2</sup>To whom correspondence should be addressed. Email: Karen.Anderson.1@asu.edu, Joseph.Blattman@asu.edu, or linda.klavinskis@kcl.ac.uk.

#### Contents:

**Supporting Materials and Methods**

**Figs. S1-S5**

**Tables S2-S7**

## Supporting Materials and Methods

**Construction of datasets.** All MHC class I peptides used in this study for analyses and the design of ANN-Hydro prediction model were retrieved from IEDB (1) ([www.iedb.org](http://www.iedb.org), last accessed: 08/11/2014). The IEDB is the largest curated dataset of MHC-I peptides identified from different primary research studies from over 334 different source organisms. We set the “Immune recognition context” as T cell response and selected “MHC class I” as the criteria for data retrieval. In total, there were 28,444 T cell epitopes reported to be immunogenic by T cell assays, including self and pathogenic epitopes and 6,142 peptides were reported to be positive by ligand elution analysis (either mass spectrometry or HPLC). To avoid redundancy and overrepresentation bias, we excluded all duplicate peptides, so that each peptide is present only once in the dataset. Positive CTL epitopes represent the immunogenic epitope group. Ligand eluted MHC-I self-peptides are generally eluted from cell surface and therefore they have been antigenically processed and MHC-bound. A vast majority of eluted self-peptides are derived from endogenous proteins. To completely separate immunogenic and non-immunogenic datasets, any immunogenic eluted self-peptide associated with autoimmunity or cancer was excluded. The remaining peptides were used as the non-immunogenic peptide dataset for our analyses. Additionally, we removed any pathogen derived non-self- eluted peptides from the eluted peptide dataset to generate mutually exclusive datasets. These unique peptides were further annotated for antigen name, peptide starting position, peptide ending position, and MHC restriction, which were required for inclusion. Peptides with “undetermined class I alleles” were also excluded. These filtering criteria resulted in a final dataset of 5,035 8-11mer immunogenic epitopes and 4,853 8-11mer non-immunogenic peptides (Table S1).

**Amino acid frequency analysis.** Overrepresentation of certain amino acids in immunogenic peptides was identified by calculating probability ratios of amino acids given by  $P(x \mid \text{immunogenic})/P(x \mid \text{non-immunogenic})$ , where  $P(x \mid \text{immunogenic})$  and  $P(x \mid \text{non-immunogenic})$  correspond to probability mass functions and  $x$  is an amino acid. Individual amino acid probability mass functions were calculated from their frequency distributions of immunogenic epitopes and non-immunogenic peptides. Spearman’s rank

correlations were quantified between probability ratios and biochemical properties (hydrophobicity, polarity, or bulkiness) of amino acids using the described amino acid scales.

**Position-based hydrophobicity analysis.** We transformed our datasets of immunogenic and non-immunogenic peptides into numeric arrays using the R statistical software (2). Separate numeric arrays were generated for immunogenic and non-immunogenic 8, 9 and 10mers. Mean hydrophobicity of immunogenic and non-immunogenic peptides at each position was calculated and were compared residue-by-residue through Wilcoxon rank-sum tests to quantify statistical significance.

**Rate analysis of predicted peptides.** An efficient prediction algorithm identifies consistently all possible CTL epitopes from a given protein in the fewest number of “hits” consistently. For each test protein, we created a subset with unique CTL epitopes retrieved either from the IEDB database. Each predicted peptide starting from rank one was queried for an exact match in the dataset of CTL epitopes. When there was an exact match, a positive hit was recorded. Graphical representations comparing the rate of predictions by the IEDB-consensus binding prediction algorithm and hydrophobicity-based predictions were generated (Fig 3).

**Hydrophobicity-based ANN prediction model (ANN-Hydro).** The R neuralnet package was used to design and train the two ANN-Hydro models on H-2D<sup>b</sup> and HLA-A2 restricted 9mer peptides known to be immunogenic (n=204 and n=374, respectively) or non-immunogenic (n=232 and n=201, respectively). Each peptide sequence in the respective H-2D<sup>b</sup> and HLA-A2 datasets were transformed into a corresponding numeric sequence based on the hydrophobicity value of amino acids. Training peptides were derived from IEDB and SYFPEITHI’s epitope database (1, 3). A three-layer fully connected feed-forward ANN was comprised by nine input neurons, one hidden layer with three neurons, and one output variable (Fig. S3).

Our ANN-Hydro prediction model is given by the following mathematical framework:

$$y(H) = f\left(w_0 + \sum_{i=1}^3 w_i \cdot f(w_{0i} + W_i^T H)\right),$$

where  $w_0$  denotes the intercept of the output neuron and  $w_{0i}$  the intercept of the  $i^{\text{th}}$  hidden neuron.

Additionally,  $w_i$  denotes the synaptic weight corresponding to the synapse starting at the  $i^{\text{th}}$  hidden neuron and leading to the output neuron.  $W_i = (w_{1i}, w_{2i}, \dots, w_{9i})$  is the vector of all synaptic weights corresponding to the synapse leading to the  $i^{\text{th}}$  hidden neuron, and  $H = (h(R_1), h(R_2), \dots, h(R_9))$  the vector of all inputs, which corresponds to the numeric hydrophobicity representation of a 9mer peptide, where  $h(R_i)$  is the hydrophobicity value of the amino acid  $R_i$ . Finally, the output variable  $y(H)$  denotes the probability of a peptide being immunogenic (p-ANN-Hydro). Since the starting values for the weights are drawn from the standard normal distribution, the outputs were averaged over 60 realizations. The activation function  $f(v)$  was chosen to be the sigmoid function  $f(v) = 1 / (1 + e^{-v})$ , and the sum of squared errors was used for the error function. The learning procedure was the resilient back-propagation with learning rate set to 0.01; a threshold set to 0.01 was defined for the partial derivatives of the error function.

**Application of ANN-Hydro.** For each H-2D<sup>b</sup> and HLA-A2 restricted epitope prediction, we used the MHC-binding prediction tool IEDB-consensus to generate a list of epitope predictions on which the immunogenicity model could be applied. We normalized prediction binding scores (percentile rank) using the expression  $S_{B_i} = (\delta_i - \delta_{\min}) / (\delta_{\max} - \delta_{\min})$  where  $S_{B_i}$  represents the normalized score of a given peptide;  $\delta_i$ , the assigned output score by IEDB-consensus;  $\delta_{\min}$ , the minimum score assigned in prediction output by IEDB; and  $\delta_{\max}$ , the maximum score assigned in the entire prediction output by IEDB. To remove poor binding peptides from the list, a subset of predicted peptides was selected by defining a  $S_B$ -threshold of 0.2 for antigen length  $\leq 100$  aa's and a  $S_B$ -threshold of 0.1 (10<sup>th</sup> percentile of predicted binders) for antigen length  $>100$  aa's. Independently, probabilities of immunogenicity were obtained by applying the ANN-Hydro model to this subset of binding predictions. Normalized scores ( $S_i$ ) were then

assigned based on these probabilities of immunogenicity. Within the spectrum of predicted binders, we prioritized epitope re-ranking based on both  $S_B$  and  $S_I$  scores with first priority given to high-immunogenicity high-binders (probability of immunogenicity  $\geq 0.4$  and  $S_B \leq 0.05$ ; region I in Fig. S3), followed by modest-immunogenicity high-binders (probability of immunogenicity  $< 0.4$  and  $S_B \leq 0.05$ ; region II in Fig. S3), then high-immunogenicity modest-binders (probability of immunogenicity  $\geq 0.4$  and  $S_B > 0.05$ ; region III in Fig. S3), and modest-immunogenicity modest-binders (probability of immunogenicity  $< 0.4$  and  $S_B > 0.05$ ; region IV in Fig. S3). For the antigens with length  $\leq 100$  aa's, the  $S_B$  cutoff for the four regions was set to 0.1 and probability of immunogenicity threshold remained at 0.4. Predicted peptides in each section were re-ranked based on a total score defined as  $S = S_B \cdot S_I$ . Final ranked list was obtained by sequential appending of the re-ranked peptides from each region. The list of predicted peptides was ranked based on this total score ranging from lowest score to the highest score. The lower the total score of a predicted peptide, the higher its probability of being an immunogenic epitope. Workflow of the prediction strategy is shown in Fig. S3.

**Statistical analysis of predicted CTL epitopes.** We used the F-test to quantify statistical significance ( $P < 0.05$ ) of the variation of predicted rankings of T cell epitopes across different antigens between ANN-Hydro together with IEDB-consensus and IEDB-consensus alone.

### ***In vivo* discovery of HIV-1 Gag epitopes**

**Mice.** C57BL/6 mice were obtained from Harlan Laboratories. All mice used were between 6 and 8 weeks of age. All animal study protocols were conducted in accordance with guidelines approved by the Institutional Animal Care and Use Committee at Kings College London and in full compliance with UK Home Office regulations under a project license to L.S.K.

**Vaccine immunization.** Codon optimized HIV-1 gag plasmid DNA ZM96 from strain 96ZM651.8 (provided by B Hahn, through the Centre for AIDS Reagents [CFAR] UK) and codon optimized HIV-1 gag

Consensus B plasmid DNA (provided by D Garber, Emory University, USA) were used to construct and propagate replication defective (E1, E3 deleted) recombinant Adenovirus type 5 (rAdHu5) vectors as described previously for the HIV-1 gag strain 97CN54(4). Animals were immunized with  $10^9$  virus particles (vp) as determined by the DNA Pico-Green assay (Invitrogen) and administered either i.m. in the quadriceps muscle (rAdHu5 Consensus B gag) or i.d. at the base of the tail (rAdHu5 ZM96 and rAdHu5 CN54).

**Peptides.** 15mer peptides with an 11 amino acid overlap spanning the HIV-1 CN54 Gag protein and a 20mer set of peptides with 10 amino acid overlap spanning HIV-1 ZM96 were provided by CFAR, a set of 15mers with an 11 amino acid overlap spanning the HIV-1 Consensus subtype B Gag protein were provided from the NIH AIDS Reagent and Reference Program. 'Optimal' 9mer or 11mer peptides from HIV-1 CN54 Gag, ZM96 Gag and HIV-1 Consensus B were purchased from Proimmune.

**T cell epitope mapping by intracellular interferon gamma staining.** Spleens were harvested 14 days after immunization, homogenized to single-cell suspensions, and RBCs were lysed using ACK lysis buffer (Lonza). Splenocytes were then used for *in vitro* re-stimulation, where  $10^6$  cells were incubated for 6 h at 37°C with anti-CD28 (2µg/ml; BD Pharmingen), either alone (unstimulated control) or with peptides, either in pools or individually (each at 1µg peptide/ml), derived from Consensus B Gag. Brefeldin A (10µg/ml, Sigma-Aldrich) was added for the last 5 h of culture. After washing, cells were stained with anti-CD8 (clone 37.51, BD Biosciences) for 20 min, then fixed and permeabilized with the BD Cytofix/Cytoperm Kit according to the manufacturers' instructions, and then stained 30 min with anti-IFN-γ (clone XMG1.2, eBiosciences), washed and analyzed by flow cytometry. Consensus B epitopes were deconvoluted to individual 15mers from peptide pools, where each peptide is present in two independent pools within the matrix and reactive peptides confirmed in the second round against the 15mer peptide. Finally, based on the sequence of the reactive 15mer peptide, truncated versions of the 15mer peptides were synthesized and tested.

**T cell epitope mapping by ELISPOT assay.** 14 days after immunization, splenocytes prepared (as detailed above) were re-stimulated *in vitro* with media alone, or with peptides, either in pools or individually (each at 1 $\mu$ M final concentration) derived from CN54 or ZM96 Gag on mouse anti-IFN- $\gamma$  antibody coated 96 well plates (U-Cytech) and incubated for 16 h at 37°C, 5% CO<sub>2</sub>. IFN- $\gamma$  production was revealed according to the manufacturer's instructions and IFN- $\gamma$  spot forming cells (SFCs) enumerated using an immunospot image analyser (Bioreader 5000). In the first round, CN54 Gag epitopes were deconvoluted to individual 15mers from peptide pools, where each peptide is present in two independent pools within the matrix and reactive peptides confirmed in the second round against the 15mer peptide. Finally, based on the sequence of the reactive 15mer peptide, 9mer peptides were synthesized and tested. For ZM96 (due to the absence of a complete set of overlapping 15mer peptides), 49 individual 20mer peptides were tested. The reactive peptide sequences were confirmed against the corresponding 15mer peptide to the reactive sequence and then 9mer peptides synthesized and tested.

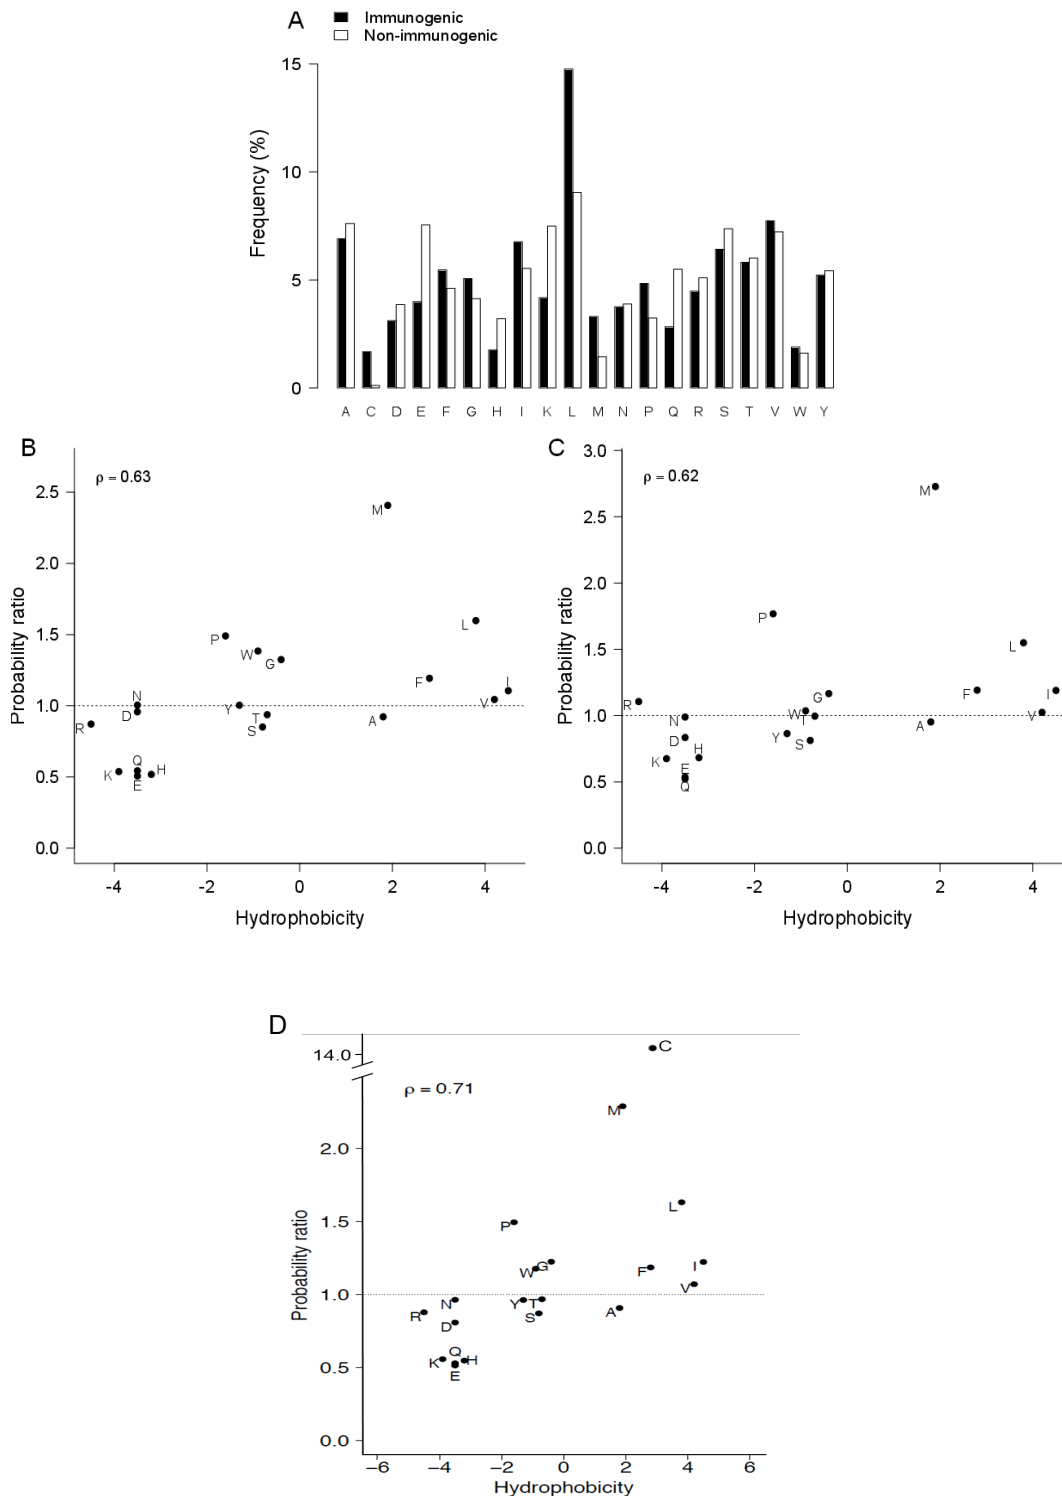

**Fig. S1. Bias in amino acid usage between immunogenic and non-immunogenic MHC-I peptides.** (A) Comparison of frequency distributions of amino acids between immunogenic and non-immunogenic datasets. (B) Probability ratio ( $P(x | \text{immunogenic})/P(x | \text{non-immunogenic})$ ) of each amino acid as a function of its hydrophobicity, analyzed on just 9mer MHC-I peptides. (C) Probability ratio ( $P(x | \text{immunogenic})/P(x | \text{non-immunogenic})$ ) of each amino acid as a function of its hydrophobicity, analyzed on 9mer HLA-I peptides excluding HLA-A2 restricted peptides. (D) Probability ratio of each amino acid as a function of its hydrophobicity; the plot shows cysteine (C) as an outlier in the immunogenic dataset.



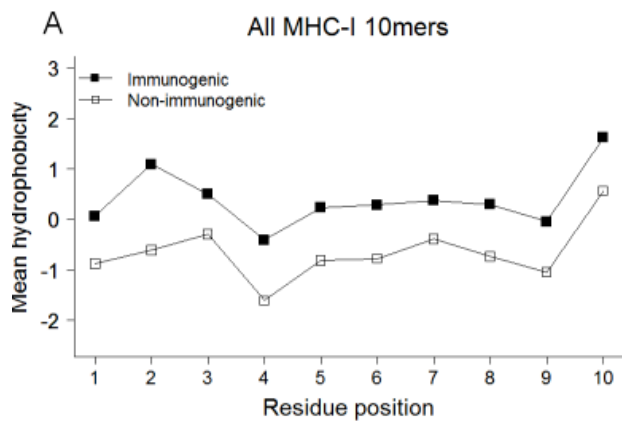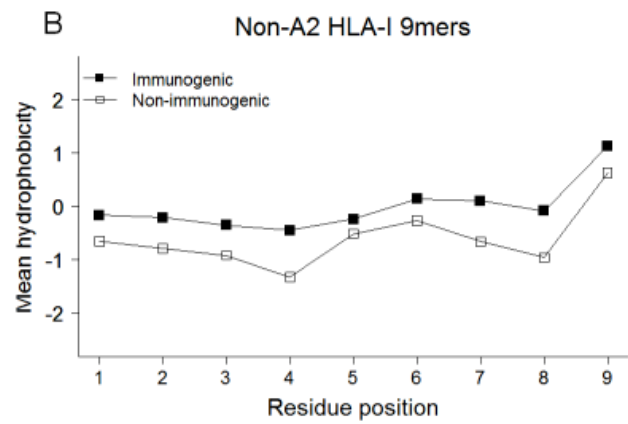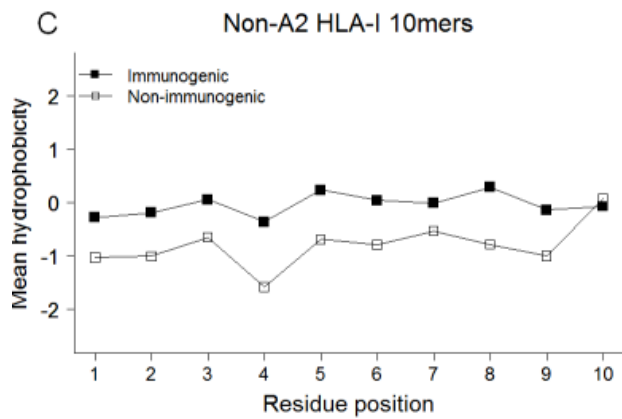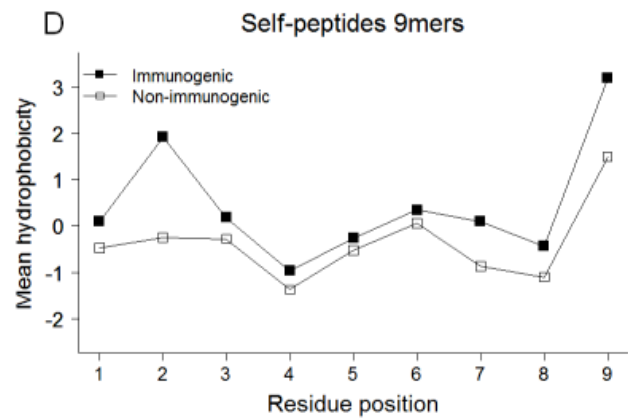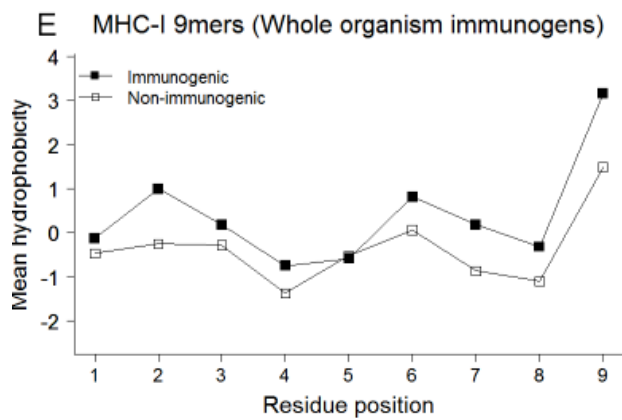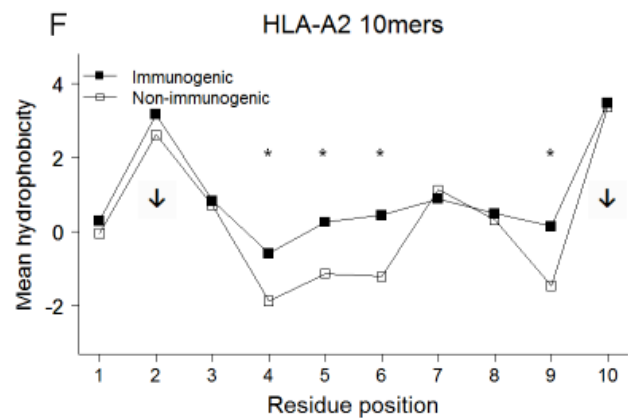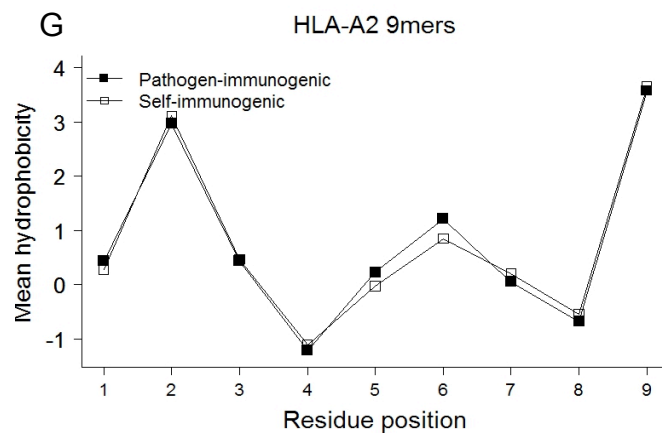

**Fig. S2. Hydrophobicity comparison at each residue position between immunogenic and non-immunogenic MHC-I peptides, and immunogenic pathogen-derived and immunogenic self-epitopes.** Each peptide sequence in the dataset was transformed into a numeric sequence based on amino acid hydrophobicity and the mean hydrophobicity at each position was computed. Unless indicated, analyzed peptides were not restricted to any MHC-motifs. (A) All immunogenic and non-immunogenic MHC-I 10mers; every single residue has  $P < 2 \times 10^{-7}$ . (B) Human HLA-I immunogenic and non-immunogenic 9mers excluding HLA-A2 restricted peptides. (C) Human HLA-I immunogenic and non-immunogenic 10mers excluding HLA-A2 restricted peptides. (D) Immunogenic and non-immunogenic MHC-I 9mer self-peptides. (E) MHC-I 9mers peptides discovered using whole organism as immunogen as opposed to peptide-immunization experiments (non-immunogenic dataset – same as Fig. 2A) (F) Human HLA-A2 restricted immunogenic and non-immunogenic 10mers with arrows indicating anchor residues and stars for  $P < 0.005$ . (G) Human HLA-A2 restricted immunogenic pathogen-derived and immunogenic self 9mer epitopes.  $P$ -values for each figure were obtained using Wilcoxon rank-sum test and are shown in Table S3.

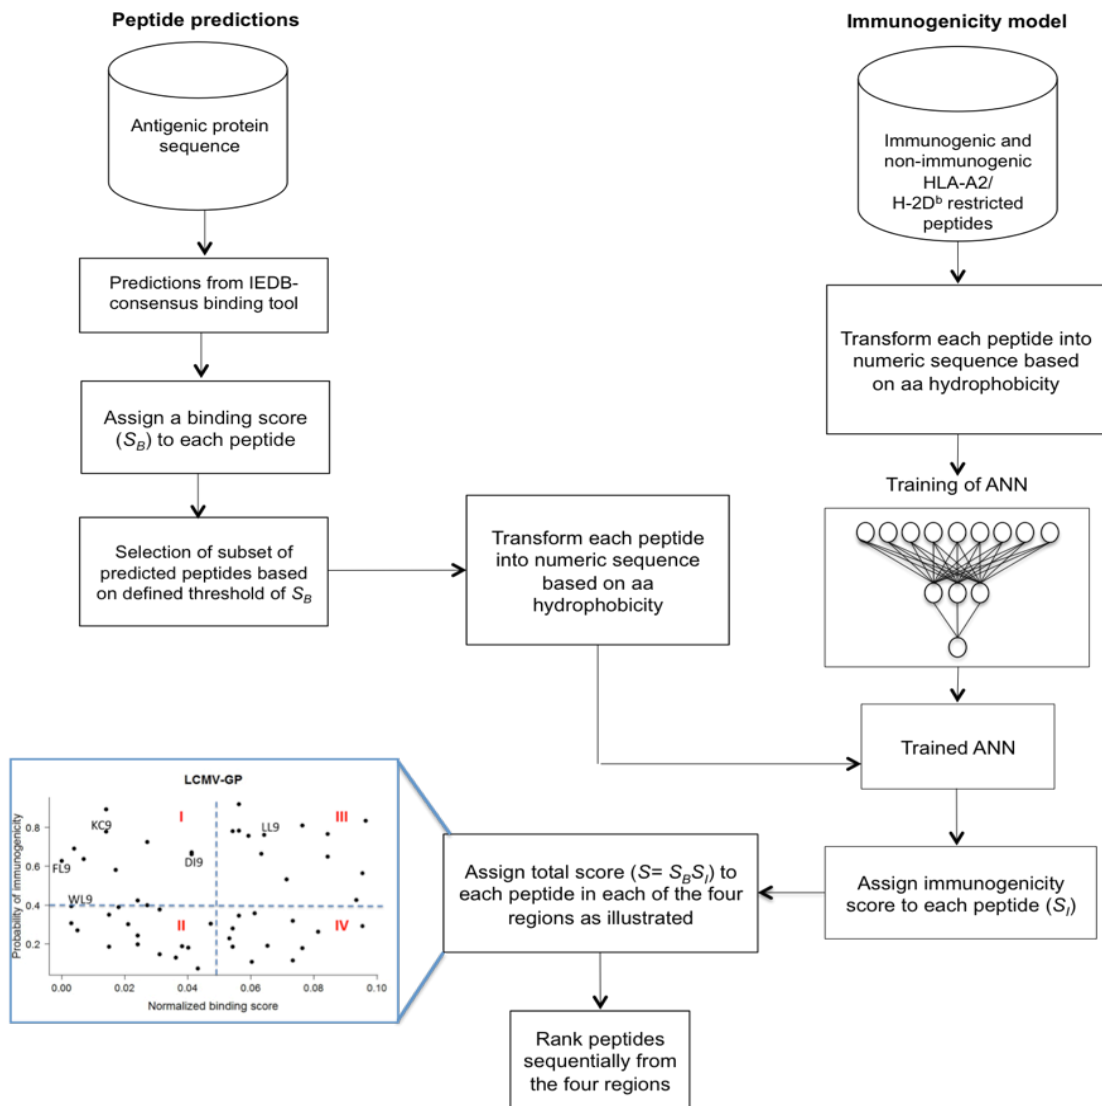

**Fig. S3. Workflow for CTL epitope prediction using the ANN-Hydro model and the MHC-binding prediction tool IEDB-consensus.** For training and application of the ANN-Hydro model for immunogenicity scores, each peptide sequence in the HLA-A2 and H-2D<sup>b</sup> dataset was transformed into a corresponding numeric sequence based on the hydrophobicity value of amino acids. To obtain a list of candidates for MHC-bound peptides from a given antigen, IEDB-consensus binding algorithm was used and a normalized binding score ( $S_B$ ) was assigned. The trained immunogenicity ANN model was applied on the same list of peptides independently to assign immunogenicity scores ( $S_I$ ). After the subset of top binding peptides was selected, peptides from each region ranging from high-binding highly-immunogenic peptides to modest-binding low-immunogenic peptides (quadrants 1 through 4 in inset) were re-ranked based on total score  $S = S_B \cdot S_I$ . An example of epitope prediction is shown in the plot for experimentally defined H-2D<sup>b</sup> restricted CTL epitopes from LCMV-GP. See Materials and Methods section Application of ANN-Hydro for full details.

|   | A    | B    | C    | D    | E    | F    | G    | H    | I    | J    | K    | L    |
|---|------|------|------|------|------|------|------|------|------|------|------|------|
| M | 7872 | 7873 | 7874 | 7875 | 7876 | 7877 | 7878 | 7879 | 7880 | 7881 | 7882 | 7883 |
| N | 7884 | 7885 | 7886 | 7887 | 7888 | 7889 | 7890 | 7891 | 7892 | 7893 | 7894 | 7895 |
| O | 7896 | 7897 | 7898 | 7899 | 7900 | 7901 | 7902 | 7903 | 7904 | 7905 | 7906 | 7907 |
| P | 7908 | 7909 | 7910 | 7911 | 7912 | 7913 | 7914 | 7915 | 7916 | 7917 | 7918 | 7919 |
| R | 7920 | 7921 | 7922 | 7923 | 7924 | 7925 | 7926 | 7927 | 7928 | 7929 | 7930 | 7931 |
| S | 7932 | 7933 | 7934 | 7935 | 7936 | 7937 | 7938 | 7939 | 7940 | 7941 | 7942 | 7943 |
| T | 7944 | 7945 | 7946 | 7947 | 7948 | 7949 | 7950 | 7951 | 7952 | 7953 | 7954 | 7955 |
| U | 7956 | 7957 | 7958 | 7959 | 7960 | 7961 | 7962 | 7963 | 7964 | 7965 | 7966 | 7967 |
| V | 7968 | 7969 | 7970 | 7971 | 7972 | 7973 | 7974 | 7975 | 7976 | 7977 | 7978 | 7979 |
| W | 7980 | 7981 | 7982 | 7983 | 7984 | 7985 | 7986 | 7987 | 7988 | 7989 | 7990 | 7991 |
| X | 7992 | 7993 | 7994 |      |      |      |      |      |      |      |      |      |

|     | P12 | P13 | P14 | P15 | P16 | P17 | P18 | P19 | P20 | P21 | P22 |
|-----|-----|-----|-----|-----|-----|-----|-----|-----|-----|-----|-----|
| P1  | 1   | 2   | 3   | 4   | 5   | 6   | 7   | 8   | 9   | 10  | 11  |
| P2  | 12  | 13  | 14  | 15  | 16  | 17  | 18  | 19  | 20  | 21  | 22  |
| P3  | 23  | 24  | 25  | 26  | 27  | 28  | 29  | 30  | 31  | 32  | 33  |
| P4  | 34  | 35  | 36  | 37  | 38  | 39  | 40  | 41  | 42  | 43  | 44  |
| P5  | 45  | 46  | 47  | 48  | 49  | 50  | 51  | 52  | 53  | 54  | 55  |
| P6  | 56  | 57  | 58  | 59  | 60  | 61  | 62  | 63  | 64  | 65  | 66  |
| P7  | 67  | 68  | 69  | 70  | 71  | 72  | 73  | 74  | 75  | 76  | 77  |
| P8  | 78  | 79  | 80  | 81  | 82  | 83  | 84  | 85  | 86  | 87  | 88  |
| P9  | 89  | 90  | 91  | 92  | 93  | 94  | 95  | 96  | 97  | 98  | 99  |
| P10 | 100 | 101 | 102 | 103 | 104 | 105 | 106 | 107 | 108 | 109 | 110 |
| P11 | 111 | 112 | 113 | 114 | 115 | 116 | 117 | 118 | 119 | 120 | 121 |

**Fig. S4. Schematic of ConsB (top) and CN54 (bottom) 15mer peptide pools.** Peptides were combined at 1 $\mu$ M/each peptide such that each peptide occurs in only two pools numbered 7872 –7994 for ConsB (top) or 7080.01-7080.121 for CN54 (indicated by 1–121, bottom). Yellow highlight indicates positive response to peptide pool. Green highlight indicates positive response to individual 15mer peptide, and red indicates negative response to individual 15mer peptide.

| Source | Peptide | Amino Acid Sequence   | Immunogenicity | Confirmed Epitope |
|--------|---------|-----------------------|----------------|-------------------|
| Cons B | 7889    | QTGSEELRSLYNTVA       | +              | H-2D <sup>b</sup> |
| Cons B | 7890    | EELRSLYNTVATLYC       | +              | Gag76-84          |
| CN54   | 7080.19 | EELRSLEFNTVATPYC      | +              | RSLYNTVAT         |
| CN54   | 7080.20 | SLFNTVATPYCVHTE       | +              | RSLFNTVAT         |
| ZM96   | 7116.8  | GTEELRSLYNTVATLYCVHE  | +              | (RT9)             |
| Cons B | 7912    | EKAFSSPEVIPMFSAL      | +              | H-2K <sup>b</sup> |
| Cons B | 7913    | SPEVIPMFSALSEGA       | +              | Gag168-175        |
| CN54   | 7080.41 | F-SPEVIPMFSALSEG      | +              | VIPMFSAL          |
| CN54   | 7080.42 | VIPMFSALSEGATPQ       | +              | VIPMFTAL          |
| ZM96   | 7116.17 | EKAF-SPEVIPMFTALSEGAT | +              | (VL8)             |
| Cons B | 7920    | GHQAAMQMLKETINE       | +              | H-2D <sup>b</sup> |
| Cons B | 7921    | AMQMLKETINEEAAE       | +              | Gag197-205        |
| CN54   | 7080.49 | AAMQILKDTINEEAA       | +              | AMQMLKETI         |
| ZM96   | 7116.2  | VGGHQAAMQMLKDTINEEAA  | +              | AMQILKDTI         |
|        |         |                       |                | (AI9)             |
| Cons B | 7940    | IVRMYSPTSILDIRQ       | +              | H-2D <sup>b</sup> |
| Cons B | 7941    | YSPTSILDIRQGPKE       | +              | Gag277-285        |
| CN54   | 7080.68 | KIVRMYSPTSILDIK       | +              | YSPTSILDI         |
| CN54   | 7080.69 | MYSPTSILDIKQGPK       | +              | YSPVSILDI         |
| ZM96   | 7116.28 | NKIVRMYSPPVSILDIKQGPK | +              | (YI9)             |
| Cons B | 7949    | ASQEVKNWMTETLLV       | -              | H-2D <sup>b</sup> |
| CN54   | 7080.77 | QATQGVKNWMTDTLL       | +              | Gag310-320        |
| CN54   | 7080.78 | GVKNWMTDTLLVQNA       | +              | QGVKNWMTDTL       |
| ZM96   | 7116.32 | QEVKNWMTDTLLVQNA      | -              | (QL11)            |
| Cons B | 7963    | EAMSQVTNSATIMMQ       | +              | H-2D <sup>b</sup> |
| CN54   | 7080.91 | AEAMSQ-TNSA-IILMQR    | -              | Gag368-376        |
| ZM96   | 7116.37 | RVLAEAMSQ-TNSVNIILMQK | -              | SQVTNSATI         |
|        |         |                       |                | (SI9)             |

**Fig. S5. Summary of identified epitopes.** Responses to the RT9, VL8, AI9, and YI9 epitopes were observed for all three Gag protein variants, despite minor substitutions in the peptides. Overlapping sequences of individual peptides are shown. The QL11 epitope was only immunogenic for the CN54 Gag protein, but not ConsB or ZM96 Gag proteins, likely due to the A to E substitution at position 2. The SI9 epitope was only immunogenic in the ConsB Gag protein, as both CN54 and ZM96 had major deletions and substitutions in this sequence. MHC restriction was confirmed using MHC class I tetramer staining, and Gag amino acid positions are in reference to the HXB2 strain.

| <b>Amino acid</b> | <b>Hydrophobicity</b> | <b>Bulkiness</b> | <b>Polarity</b> |
|-------------------|-----------------------|------------------|-----------------|
| Alanine (A)       | 1.8                   | 11.5             | 8               |
| Cysteine (C)      | 2.5                   | 13.46            | 5.5             |
| Aspartic acid (D) | -3.5                  | 11.68            | 13              |
| Glutamic acid (E) | -3.5                  | 13.57            | 12.3            |
| Phenylalanine (F) | 2.8                   | 19.8             | 5.2             |
| Glycine (G)       | -0.4                  | 3.4              | 9               |
| Histidine (H)     | -3.2                  | 13.69            | 10.4            |
| Isoleucine (I)    | 4.5                   | 21.4             | 5.2             |
| Lysine (K)        | -3.9                  | 15.71            | 11.3            |
| Leucine (L)       | 3.8                   | 21.4             | 4.9             |
| Methionine (M)    | 1.9                   | 16.25            | 5.7             |
| Asparagine (N)    | -3.5                  | 12.82            | 11.6            |
| Proline (P)       | -1.6                  | 17.43            | 8               |
| Glutamine (Q)     | -3.5                  | 14.45            | 10.5            |
| Arginine(R)       | -4.5                  | 14.28            | 10.5            |
| Serine (S)        | -0.8                  | 9.47             | 9.2             |
| Threonine (T)     | -0.7                  | 15.77            | 8.6             |
| Valine (V)        | 4.2                   | 21.57            | 5.9             |
| Tryptophan (W)    | -0.9                  | 21.67            | 5.4             |
| Tyrosine (Y)      | -1.3                  | 18.03            | 6.2             |

**Table S2. Amino acid property scales used for analyses.** Hydrophobicity scale (Kyte-Doolittle) (5), Polarity (Grantham) (6), and Bulkiness (Zimmerman) (7).

**Table S3.**

| Dataset                             | Sample size                   |                         | Residue position in peptide |                         |                      |                         |                       |                       |                         |                         |                         |                         |
|-------------------------------------|-------------------------------|-------------------------|-----------------------------|-------------------------|----------------------|-------------------------|-----------------------|-----------------------|-------------------------|-------------------------|-------------------------|-------------------------|
|                                     | Immunogenic                   | Non Immunogenic         | P1                          | P2                      | P3                   | P4                      | P5                    | P6                    | P7                      | P8                      | P9                      | P10                     |
| All MHC-I 9mers                     | 2841                          | 2660                    | 6.6x10 <sup>-15</sup>       | < 2.2x10 <sup>-16</sup> | 1.7x10 <sup>-8</sup> | < 2.2x10 <sup>-16</sup> | 4.6x10 <sup>-5</sup>  | 1.6x10 <sup>-5</sup>  | < 2.2x10 <sup>-16</sup> | < 2.2x10 <sup>-16</sup> | < 2.2x10 <sup>-16</sup> | -                       |
| All MHC-I 10mers                    | 1007                          | 1013                    | 1.4x10 <sup>-13</sup>       | < 2.2x10 <sup>-16</sup> | 1.7x10 <sup>-9</sup> | < 2.2x10 <sup>-16</sup> | 1.3x10 <sup>-13</sup> | 1.7x10 <sup>-15</sup> | 2x10 <sup>-7</sup>      | 3.3x10 <sup>-12</sup>   | 1.2x10 <sup>-15</sup>   | < 2.2x10 <sup>-16</sup> |
| NonA2 HLA-I 9mers                   | 1318                          | 1897                    | 1.4x10 <sup>-6</sup>        | 7.8x10 <sup>-6</sup>    | 7.6x10 <sup>-8</sup> | < 2.2x10 <sup>-16</sup> | 0.1561                | 3x10 <sup>-4</sup>    | 2.6x10 <sup>-13</sup>   | < 2.2x10 <sup>-16</sup> | 3.5x10 <sup>-14</sup>   | -                       |
| NonA2 HLA-I 10mers                  | 518                           | 859                     | 3.4x10 <sup>-7</sup>        | 1.4x10 <sup>-6</sup>    | 1.4x10 <sup>-6</sup> | 4.6x10 <sup>-13</sup>   | 8.8x10 <sup>-8</sup>  | 1.4x10 <sup>-6</sup>  | 0.0023                  | 1.5x10 <sup>-8</sup>    | 2.9x10 <sup>-8</sup>    | 0.2293                  |
| Self-peptides 9mers                 | 565                           | 2660                    | 2.1x10 <sup>-4</sup>        | < 2.2x10 <sup>-16</sup> | 1x10 <sup>-4</sup>   | 7.8x10 <sup>-5</sup>    | 0.292                 | 0.1423                | 1.2x10 <sup>-11</sup>   | 2.2x10 <sup>-7</sup>    | < 2.2x10 <sup>-16</sup> | -                       |
| MHC-I 9mers<br>(Immunogen=Organism) | 323                           | 2660                    | 0.06781                     | 6.5x10 <sup>-9</sup>    | 0.0071               | 1x10 <sup>-5</sup>      | 0.6156                | 1.3x10 <sup>-4</sup>  | 1.5x10 <sup>-8</sup>    | 3.2x10 <sup>-6</sup>    | < 2.2x10 <sup>-16</sup> | -                       |
| HLA A2 9mers                        | 936                           | 321                     | 0.6384                      | 0.8929                  | 0.8487               | 6.3x10 <sup>-12</sup>   | 0.2917                | 3.1x10 <sup>-7</sup>  | 5x10 <sup>-13</sup>     | < 2.2x10 <sup>-16</sup> | 0.08106                 | -                       |
| HLA A2 10mers                       | 288                           | 77                      | 0.4029                      | 0.2247                  | 0.5054               | 0.00094                 | 0.00087               | 1x10 <sup>-5</sup>    | 0.3368                  | 0.9912                  | 5.5x10 <sup>-6</sup>    | 0.09147                 |
| MHC H-2K <sup>b</sup> 8mers         | 306                           | 315                     | 0.06678                     | 0.9329                  | 0.0055               | 0.2288                  | 0.6742                | 7x10 <sup>-5</sup>    | 1.1x10 <sup>-6</sup>    | 0.1513                  | -                       | -                       |
| MHC H-2D <sup>b</sup> 9mers         | 194                           | 228                     | 0.1825                      | 0.0087                  | 2.1x10 <sup>-4</sup> | 0.3298                  | 4.9x10 <sup>-10</sup> | 0.7829                | 1.1x10 <sup>-4</sup>    | 0.0013                  | 0.1273                  | -                       |
|                                     | <b>Immunogenic pathogenic</b> | <b>Immunogenic self</b> |                             |                         |                      |                         |                       |                       |                         |                         |                         |                         |
| HLA A2 9mers                        | 1508                          | 244                     | 0.389                       | 0.385                   | 0.877                | 0.97                    | 0.13                  | 0.04                  | 0.776                   | 0.35                    | 0.63                    |                         |

Anchor residues  
TCR contact residues

Hydrophobicity comparison between immunogenic and non-immunogenic MHC class I peptides. *P*-values were calculated using Wilcoxon sum-ranked test using different datasets as described in main text.

| Antigen            | Epitope     | Epitope length |
|--------------------|-------------|----------------|
| CMV-pp65           | NLVPMVATV   | 9              |
|                    | MLNIPSINV   | 9              |
|                    | VLGPISGHV   | 9              |
|                    | RLLQTGIHV   | 9              |
|                    | LMNGQQIFL   | 9              |
|                    | ILARNLVPM   | 9              |
|                    | SLILVSQYT   | 9              |
|                    | SIYVYALPL   | 9              |
|                    | VIGDQYVKV   | 9              |
|                    | YLESFCEDV   | 9              |
|                    | AMAGASTSA   | 9              |
|                    | KYQEFFWDA   | 9              |
|                    | GLSISGNLL   | 9              |
|                    | RQYDPVAAL   | 9              |
|                    | VAALFFFDI   | 9              |
|                    | ALFFFDIDL   | 9              |
|                    | KISHIMLDVA  | 10             |
|                    | SDNEIHNPVAV | 10             |
| FTWPPWQAGI         | 10          |                |
| LLCPKSIPGL         | 10          |                |
| Dengue-Polyprotein | VLMVAHYA    | 9              |
|                    | ILLMRTTWA   | 9              |
|                    | MLLALIAVL   | 9              |
|                    | TLYAVATTI   | 9              |
|                    | QEGAMHTAL   | 9              |
|                    | LPAIVREAI   | 9              |
|                    | SRNSTHEMY   | 9              |
|                    | AIVREAIKR   | 9              |
|                    | YLPVIVREA   | 9              |
|                    | TLLCLIPTV   | 9              |
|                    | VLNPYMPSV   | 9              |
|                    | LMMMLPATL   | 9              |
|                    | VTYECPLLV   | 9              |
|                    | MMMLPATLA   | 9              |
|                    | IILEFFLMV   | 9              |
|                    | KTDFGFYQV   | 9              |
|                    | VQADMGCVV   | 9              |
|                    | GLLFMILTV   | 9              |
|                    | QLWAALLSL   | 9              |
|                    | LLMRTTWAL   | 9              |
|                    | CLMMMLPATL  | 10             |
|                    | ELMRRGDLPV  | 10             |
|                    | MLLILCVTQV  | 10             |
|                    | FLMVLLIPEP  | 10             |
|                    | TLMLLALIAV  | 10             |
|                    | LMLLALIAVL  | 10             |
|                    | IILEFFLMVL  | 10             |
|                    | TLTAAVLLL   | 10             |
|                    | VLLLVTHYAI  | 10             |
|                    | ITLLCLIPTV  | 10             |
|                    | KVLNPYMPSV  | 10             |
|                    | HQLWATLLSL  | 10             |
|                    | YTPEGIPTL   | 10             |
| SIILEFFLMV         | 10          |                |
| LSMGLITIAV         | 10          |                |
| NQLIYVILTI         | 10          |                |
| LMMMLPATLA         | 10          |                |
| TLMAMDLGEL         | 10          |                |
| FTMGVLC LAI        | 10          |                |

**Table S4. HLA-A2 restricted CTL epitopes for dengue virus 1 polyprotein and cytomegalovirus pp65 used in the rate analysis of predicted epitopes as shown in Fig. 3. All epitopes were retrieved from IEDB (1).**



| Source                           | Epitope   | Antigen     | p-ANN-Hydro | Reference        |
|----------------------------------|-----------|-------------|-------------|------------------|
| <b>Neo-epitopes</b>              |           |             |             |                  |
| Rotavirus                        | SLISGMWLL | Rota-VP2_4  | 0.89        | Newell et al.    |
|                                  | TLLANVTAV | Rota-VP6_4  | 0.87        |                  |
|                                  | FLDSEPHLL | Rota-NSP1_2 | 0.84        |                  |
|                                  | LLNYILKSV | Rota-VP7_1  | 0.37        |                  |
| Influenza-A (FluA)               | QIAILVTTV | NA          | 0.90        | Assarsson et al. |
|                                  | GLIYNRMGA | M1          | 0.89        |                  |
|                                  | GILGFVFTL | Flu_1       | 0.80        |                  |
|                                  | FVEALARSI | PB1         | 0.58        |                  |
|                                  | VMNILLQYL | GAD         | 0.57        |                  |
|                                  | FVANFSMEL | PB1         | 0.54        |                  |
|                                  | TTYQRTRAL | NP          | 0.47        |                  |
|                                  | GLADQLIHL | HIV_7       | 0.47        |                  |
| Dengue-Virus 2<br>(DENV-2)       | GLLTVCYVL | NS2B        | 0.88        | Weiskopf et al.  |
|                                  | RLITVNPV  | E           | 0.88        |                  |
|                                  | IMAVGMVSI | NS2B        | 0.85        |                  |
|                                  | IILEFFLIV | NS4A        | 0.79        |                  |
|                                  | ALSELPETL | NS4A        | 0.61        |                  |
|                                  | YLPVAVREA | NS3         | 0.50        |                  |
|                                  | KLAEAIFKL | NS5         | 0.44        |                  |
|                                  | AAAWYLWEV | NS3         | 0.27        |                  |
| <b>Positive Control epitopes</b> |           |             |             |                  |
| Human<br>herpesvirus 5<br>(CMV)  | ALFFFDIDL | CMV_5       | 0.84        | Newell et al.    |
|                                  | LMNGQQIFL | CMV_18      | 0.81        |                  |
|                                  | RIFAELEGV | CMV_22      | 0.81        |                  |
|                                  | QMWQARLTV | CMV_21      | 0.78        |                  |
|                                  | NLVPMVATV | CMV_1       | 0.75        |                  |
|                                  | VLEETSVML | CMV-IE1     | 0.72        |                  |
|                                  | FLMEHTMPV | CMV_8       | 0.61        |                  |
|                                  | IYTRNHEV  | CMV_13      | 0.54        |                  |
|                                  | SLLSEFCRV | CMV_23      | 0.52        |                  |
|                                  | ILSPLTKGI | CMV_15      | 0.46        |                  |
|                                  | VLAELVKQI | CMV_2       | 0.24        |                  |
| Human<br>herpesvirus 4<br>(EBV)  | GLCTLVAML | EBV_2       | 0.87        | Newell et al.    |
|                                  | YVLDHLIVV | EBV_1       | 0.84        |                  |
|                                  | YLQQNWWTL | EBV_5       | 0.79        |                  |
|                                  | CLGGLLTMV | EBV_4       | 0.79        |                  |
|                                  | YLLEMLWRL | EBV_3       | 0.28        |                  |
| Influenza-A (FluA)               | FLDIWYNA  | Flu_4       | 0.85        |                  |
|                                  | NMLSTVLGV | Flu_14      | 0.78        |                  |
|                                  | LLIDGTASL | Flu_12      | 0.68        |                  |

|                                      |           |            |      |               |
|--------------------------------------|-----------|------------|------|---------------|
|                                      | FMYSDFHFI | Flu_5      | 0.63 |               |
|                                      | MMMGMFNML | Flu_13     | 0.48 |               |
|                                      | GMFNMLSTV | Flu_7      | 0.29 |               |
|                                      | RLIDFLKDV | Flu_15     | 0.23 |               |
| Hepatitis B virus (HBV)              | WLSLLVPFV | HBV_2      | 0.89 | Newell et al. |
|                                      | FLLSLGIHL | HBV_5      | 0.74 |               |
|                                      | FLLTRILTI | HBV_1      | 0.70 |               |
| Human Immunodeficiency virus (HIV-1) | NVWATHACV | HIV_1      | 0.94 |               |
|                                      | TLNAWVKVV | HIV_2      | 0.86 |               |
|                                      | KLTPLCVTL | HIV_4      | 0.84 |               |
|                                      | SLYNTVATL | HIV_5      | 0.61 |               |
|                                      | ALVEMGHHA | HIV_8      | 0.44 |               |
|                                      | ILKEPVHGV | HIV_9      | 0.38 |               |
|                                      | LTFGWCFKL | HIV_6      | 0.36 |               |
| Mycobacterium tuberculosis           | GLPVEYLQV | TB_1       | 0.85 |               |
|                                      | KLIANNTRV | TB         | 0.79 |               |
| Plasmodium falciparum                | YLNKIQNSL | CSP        | 0.79 |               |
| LCMV                                 | YLVSIFLHL | LCMV       | 0.77 |               |
| Herpes simplex virus (HSV-1)         | SLPITVYYA | HSV1/2     | 0.90 |               |
| RSV                                  | KMLKEMGEV | RSV        | 0.29 |               |
| Self Antigens                        | ALWMRLLPL | pp-Insulin | 0.83 |               |
|                                      | YMCSFLFNL | EZH2       | 0.51 |               |
|                                      | YMDGTMSQV | Tyrosinase | 0.49 |               |

**Table S5. Probabilities assigned by the ANN-Hydro ‘A2-model’ for HLA-A2 restricted 9mer CTL epitopes.** Three recent epitope discovery studies (8–10) that were based on a proteome-wide screen of various viral antigens and self-epitopes were chosen for assessment of the predictive capacity of the ‘A2-model’. Neo-epitopes were obtained from rotavirus (10) dengue virus (9) and influenza A (8) and other positive control epitopes from several antigens (pathogenic and self) were obtained from Newell et al. (10). Any epitope that was present in the training set for ANN-Hydro was removed. A cutoff probability (p-ANN-Hydro) of 0.4 was set for a positive “hit”.

| Antigen            | Epitope   | MHC               | Length | IEDB bind | Syfe-ithi | NetMHC .bind | IEDB. prot | ANN .prot | ANN Hydro + IEDB.bind | p-ANN-Hydro | Reference  |
|--------------------|-----------|-------------------|--------|-----------|-----------|--------------|------------|-----------|-----------------------|-------------|------------|
| LCMV-GP            | FALISFLLL | H-2D <sup>b</sup> | 9      | 1         | 10        | 1            | 3          | 1         | 1                     | 0.62        | (11)       |
|                    | WLVTNQSYL |                   | 9      | 3         | 1         | 2            | 5          | 4         | 11                    | 0.4         | (12)       |
|                    | LIDYNKAAL |                   | 9      | 45        | 12        | 39           | 68         | 77        | 32                    | 0.8         | (13)       |
|                    | KAVYNFATC |                   | 9/11   | 8         | 9         | 10           | 39         | 53        | 5                     | 0.77        | (11, 14)   |
|                    | DEVINIVII |                   | 9      | 24        | 4         | 74           | 133        | 115       | 10                    | 0.66        | (13)       |
| LCMV-NP            | FQPQNGQFI |                   | 9      | 1         | 1         | 1            | 2          | 1         | 1                     | 0.69        | (14)       |
|                    | SEVSNVQRI |                   | 9      | 7         | 2         | 7            | 37         | 50        | 12                    | 0.14        | (13)       |
| Ad.v.T. antigen    | VNIRNCCYI |                   | 9      | 1         | 1         | 1            | 1          | 1         | 13                    | 0.31        | (15)       |
|                    | CSDGNCHLL |                   | 9      | 21        | 4         | 9            | 11         | 44        | 20                    | 0.8         | (15)       |
| Flu-NP             | ASNENMETM |                   | 9      | 1         | 1         | 1            | 1          | 2         | 1                     | 0.87        | (16)       |
|                    | RLIQNSLTI |                   | 9      | 3         | 3         | 2            | 3          | 3         | 2                     | 0.67        | (16)       |
|                    | GERQNATEI |                   | 9      | 18        | 2         | 36           | 100        | 103       | 8                     | 0.42        | (16)       |
|                    | YRRVNGKWM |                   | 9      | 19        | 4         | 35           | 80         | 65        | 9                     | 0.44        | (16)       |
| FluA-Neuraminidase | FCGVNSDTV |                   | 9      | 3         | 2         | 4            | 11         | 3         | 13                    | 0.35        | (17)       |
|                    | ITYKNSTWV |                   | 9      | 4         | 8         | 3            | 4          | 2         | 1                     | 0.52        | (17)       |
|                    | YRYGNGVWI |                   | 9      | 5         | 7         | 11           | 29         | 7         | 4                     | 0.45        | (17, 18)   |
| Consensus Gag      | SQVTNSATI |                   | 9      | 1         | 1         | 1            | 1          | 1         | 7                     | 0.2         | This study |
|                    | AMQMLKETI |                   | 9      | 4         | 9         | 6            | 4          | 2         | 9                     | 0.19        |            |
|                    | YSPTSILDI |                   | 9      | 6         | 19        | 4            | 11         | 3         | 11                    | 0.39        |            |
|                    | RSLYNTVAT |                   | 9      | 3         | 32        | 5            | 45         | 29        | 1                     | 0.82        |            |
| ZM96 Gag           | AMQMLKDTI |                   | 9      | 1         | 4         | 4            | 3          | 2         | 13                    | 0.17        | This study |
|                    | YSPVSILDI |                   | 9      | 5         | 12        | 3            | 9          | 1         | 3                     | 0.43        |            |
|                    | RSLYNTVAT |                   | 9      | 4         | 28        | 5            | 46         | 27        | 2                     | 0.77        |            |
| 97CN54 Gag         | AMQILKDTI |                   | 9      | 1         | 4         | 4            | 3          | 2         | 13                    | 0.16        | This study |
|                    | YSPTSILDI |                   | 9      | 5         | 19        | 2            | 9          | 3         | 15                    | 0.36        |            |
|                    | RSLFNTVAT | 9                 | 2      | 35        | 3         | 40           | 23         | 2         | 0.76                  |             |            |
| Melan-A            | ALMDKSLHV | A2                | 9      | 1         | 3         | 1            | 1          | 1         | 0.65                  | (19)        |            |
|                    | GILTVILGV |                   | 9      | 2         | 1         | 2            | 2          | 2         | 0.86                  | (19)        |            |
|                    | ILTVILGVL |                   | 9      | 7         | 5         | 5            | 4          | 5         | 8                     | 0.9         | (19)       |
|                    | AAGIGILTV |                   | 9/10   | 9         | 4         | 7            | 19         | 17        | 9                     | 0.86        | (19)       |
| Wt-1               | SLGEQQYSV |                   | 9      | 1         | 3         | 3            | 3          | 3         | 1                     | 0.79        | (20)       |
|                    | RMFPNAPYL |                   | 9      | 2         | 10        | 2            | 2          | 2         | 2                     | 0.53        | (20)       |
|                    | ALLPAVPSL |                   | 9      | 3         | 1         | 1            | 1          | 1         | 3                     | 0.44        | (20)       |
|                    | DLNALLPAV |                   | 9      | 6         | 2         | 8            | 16         | 27        | 4                     | 0.9         | (20)       |
|                    | VLDFAPPGA |                   | 9      | 7         | 31        | 7            | 15         | 13        | 8                     | 0.87        | (20)       |
|                    | KLGAEEASA |                   | 9      | 9         | 16        | 9            | 21         | 26        | 5                     | 0.94        | (20)       |
|                    | NLGATLKGV |                   | 9      | 12        | 4         | 10           | 12         | 14        | 12                    | 0.76        | (20)       |
|                    | CMTWNQMNL |                   | 9      | 13        | 27        | 11           | 7          | 9         | 13                    | 0.69        | (20)       |
|                    | RVPGVAPTL |                   | 9      | 25        | 17        | 21           | 11         | 11        | 19                    | 0.81        | (20)       |
| gp100              | RLMKQDFSV |                   | 9      | 1         | 21        | 1            | 2          | 2         | 1                     | 0.83        | (21)       |

|        |           |    |   |    |    |    |    |    |    |      |          |
|--------|-----------|----|---|----|----|----|----|----|----|------|----------|
|        | MLGHTTMEV |    | 9 | 2  | 15 | 2  | 3  | 1  | 2  | 0.65 | (21)     |
|        | KTWGQYWQV |    | 9 | 5  | 62 | 3  | 4  | 3  | 5  | 0.5  | (21)     |
|        | YLEPGPVTA |    | 9 | 16 | 20 | 19 | 34 | 25 | 11 | 0.93 | (21)     |
| TRAG-3 | GLIQLVEGV | A2 | 9 | 1  | 1  | 1  | 1  | 1  | 1  | 0.43 | (22, 23) |
|        | HACWPAFTV |    | 9 | 9  | 10 | 6  | 9  | 20 | 9  | 0.82 | (22, 23) |
|        | SILLRDAGL |    | 9 | 6  | 2  | 8  | 5  | 7  | 5  | 0.92 | (22, 23) |
|        | ILLRDAGLV |    | 9 | 3  | 3  | 2  | 4  | 4  | 3  | 0.7  | (22, 23) |
|        | ALSKFPRQL |    | 9 | 4  | 5  | 4  | 3  | 2  | 4  | 0.34 | (22, 23) |
| p53    | RMPEAAPPV | A2 | 9 | 1  | 1  | 8  | 2  | 2  | 1  | 0.51 | (24)     |
|        | LLGRNSFEV |    | 9 | 2  | 2  | 4  | 1  | 4  | 2  | 0.46 | (24)     |
|        | VVPCEPPEV |    | 9 | 13 | 14 | 21 | 14 | 11 | 9  | 0.77 | (25)     |
|        | YQGSYGFRL |    | 9 | 5  | 5  | 65 | 3  | 3  | 10 | 0.41 | (24)     |
|        | KTCPVQLWV |    | 9 | 14 | 15 | 19 | 34 | 25 | 11 | 0.77 | (24)     |

**Table S6. Ranking comparison of all the predicted epitopes (Prevalidation and *in vivo* validation) used in this study as shown in Fig 5A.** The predictions used are as follows: ANN-Hydro - ANN-hydrophobicity prediction model combined with normalized binding scores from prediction algorithms, IEDB-Bind - IEDB consensus binding tool, NetMHC-Bind - NetMHCpan binding tool, SYFPEITHI - SYFPEITHI epitope prediction tool, IEDB-Prot-IEDB recommended processing prediction, ANN-Prot - IEDB processing predictions using ANN. p-ANN-Hydro – Probability of immunogenicity assigned by the corresponding (H-2D<sup>b</sup> or A2) ANN-Hydro immunogenicity model. All references were obtained from IEDB (1) and are indicated.

| ConsB Gag predictions |                  |                         |             |                 |
|-----------------------|------------------|-------------------------|-------------|-----------------|
| Rank                  | Epitope          | Binding score ( $S_B$ ) | p-ANN-Hydro | Total score (S) |
| 1                     | <b>RSLYNTVAT</b> | <b>0.006</b>            | <b>0.82</b> | <b>0.001</b>    |
| 2                     | ATPQDLNTM        | 0.033                   | 0.77        | 0.008           |
| 3                     | QVSQNYPIV        | 0.049                   | 0.83        | 0.008           |
| 4                     | RFAVNPGLL        | 0.025                   | 0.66        | 0.008           |
| 5                     | RMYSPTSIL        | 0.039                   | 0.72        | 0.011           |
| 6                     | KARVLAEAM        | 0.021                   | 0.40        | 0.013           |
| 7                     | <b>SQVTNSATI</b> | <b>0.000</b>            | <b>0.20</b> | <b>0.000</b>    |
| 8                     | SQVSQNYPI        | 0.004                   | 0.12        | 0.004           |
| 9                     | <b>AMQMLKETI</b> | <b>0.008</b>            | <b>0.19</b> | <b>0.006</b>    |
| 10                    | GWMTNPPPI        | 0.008                   | 0.14        | 0.007           |
| 11                    | <b>YSPTSILDI</b> | <b>0.020</b>            | <b>0.39</b> | <b>0.012</b>    |
| 12                    | RSLFGNDPS        | 0.023                   | 0.27        | 0.017           |
| 13                    | ASVLSGGEL        | 0.022                   | 0.07        | 0.020           |
| 14                    | KALGPAATL        | 0.036                   | 0.36        | 0.023           |
| 15                    | AAMQMLKET        | 0.039                   | 0.33        | 0.026           |
| 16                    | VQANPDCK         | 0.053                   | 0.84        | 0.009           |
| 17                    | SALSEGATP        | 0.054                   | 0.84        | 0.009           |
| 18                    | LLVQANPD         | 0.051                   | 0.76        | 0.012           |
| 19                    | ASLRSLFGN        | 0.096                   | 0.79        | 0.020           |
| 20                    | SLYNTVATL        | 0.061                   | 0.64        | 0.022           |

| ZM96 Gag predictions |                  |                         |             |                 |
|----------------------|------------------|-------------------------|-------------|-----------------|
| Rank                 | Epitope          | Binding score ( $S_B$ ) | p-ANN-Hydro | Total score (S) |
| 1                    | MSQTNSVNI        | 0.000                   | 0.64        | 0.000           |
| 2                    | <b>RSLYNTVAT</b> | <b>0.001</b>            | <b>0.78</b> | <b>0.000</b>    |
| 3                    | <b>YSPVSILDI</b> | <b>0.004</b>            | <b>0.43</b> | <b>0.002</b>    |
| 4                    | YMIKHLVWA        | 0.016                   | 0.77        | 0.004           |
| 5                    | KVSQNYPIV        | 0.032                   | 0.83        | 0.005           |
| 6                    | ATPQDLNTM        | 0.028                   | 0.75        | 0.007           |
| 7                    | RMYSPTSIL        | 0.040                   | 0.80        | 0.008           |
| 8                    | VQANPDCK         | 0.048                   | 0.83        | 0.008           |
| 9                    | LLVQANPD         | 0.046                   | 0.81        | 0.009           |
| 10                   | RFALNPGLL        | 0.027                   | 0.67        | 0.009           |
| 11                   | KARVLAEAM        | 0.016                   | 0.42        | 0.009           |
| 12                   | NFLQNRPEP        | 0.042                   | 0.61        | 0.017           |
| 13                   | <b>AMQMLKDTI</b> | <b>0.000</b>            | <b>0.18</b> | <b>0.000</b>    |
| 14                   | KSLFGSDPL        | 0.000                   | 0.08        | 0.000           |
| 15                   | KALGPGATL        | 0.026                   | 0.36        | 0.017           |
| 16                   | KIVRMYSVP        | 0.026                   | 0.18        | 0.021           |
| 17                   | IMKQLQPAL        | 0.039                   | 0.34        | 0.026           |
| 18                   | VKNWMTDTL        | 0.033                   | 0.18        | 0.027           |
| 19                   | AWMTSNPPI        | 0.033                   | 0.10        | 0.030           |
| 20                   | WMTSNPPPI        | 0.092                   | 0.92        | 0.007           |

| CN54 Gag predictions |                  |                         |             |                 |
|----------------------|------------------|-------------------------|-------------|-----------------|
| Rank                 | Epitope          | Binding score ( $S_B$ ) | p-ANN-Hydro | Total score (S) |
| 1                    | MSQTNSAIL        | 0.002                   | 0.85        | 0.0003          |
| 2                    | <b>RSLFNTVAT</b> | <b>0.002</b>            | <b>0.76</b> | <b>0.0004</b>   |
| 3                    | YMLKHLVWA        | 0.018                   | 0.72        | 0.005           |
| 4                    | KVSQNYPIV        | 0.032                   | 0.83        | 0.005           |
| 5                    | ATPQDLNTM        | 0.028                   | 0.78        | 0.006           |
| 6                    | SALSEGATP        | 0.049                   | 0.84        | 0.008           |
| 7                    | RFALNPGLL        | 0.027                   | 0.70        | 0.008           |
| 8                    | VQANPDCK         | 0.048                   | 0.82        | 0.008           |
| 9                    | LLVQANPD         | 0.046                   | 0.78        | 0.010           |
| 10                   | RMYSPTSIL        | 0.034                   | 0.70        | 0.010           |
| 11                   | NFLQNRPEP        | 0.042                   | 0.65        | 0.015           |
| 12                   | SALQTGTEE        | 0.042                   | 0.57        | 0.018           |
| 13                   | <b>AMQILKDTI</b> | <b>0.000</b>            | <b>0.16</b> | <b>0.000</b>    |
| 14                   | KAKVLAEAM        | 0.012                   | 0.35        | 0.008           |
| 15                   | <b>YSPTSILDI</b> | <b>0.015</b>            | <b>0.36</b> | <b>0.010</b>    |
| 16                   | RALGPGASI        | 0.020                   | 0.24        | 0.015           |
| 17                   | KSLFGNDPS        | 0.025                   | 0.28        | 0.018           |
| 18                   | IMKQLQSAL        | 0.037                   | 0.33        | 0.025           |
| 19                   | VKNWMTDTL        | 0.033                   | 0.20        | 0.027           |
| 20                   | WMTSNPPVP        | 0.077                   | 0.92        | 0.006           |

**Table S7. Ranked list of top 20 predicted peptides for each of the Gag variant using the ANN-Hydro combined with normalized binding scores from predictions.** ( $S_B$ ) - Binding score, p-ANN-Hydro - probability of immunogenicity obtained by applying ANN-Hydro model to each peptide, (S) - Total score. This list was ranked based on total score S ranging from lowest score to the highest score within each section (I through IV) classified based on p-ANN-Hydro and  $S_B$  (see section Application of ANN-Hydro).

## Supporting References

1. Vita R, et al. (2010) The immune epitope database 2.0. *Nucleic Acids Res* 38(Database issue):D854–D862. Available at: [www.iedb.org](http://www.iedb.org) [Accessed October 20, 2013].
2. R Development Core Team (2008). R: A language and environment for statistical computing. R Foundation for Statistical Computing, Vienna, Austria. (ISBN 3-900051-07-0). Available at: <http://www.r-project.org>.
3. Rammensee H, Bachmann J, Emmerich NPN, Bachor OA, Stevanović S (2000) SYFPEITHI : database for MHC ligands and peptide motifs. *Immunogenetics* (1999):213–219.
4. Bachy V, et al. (2013) Langerin negative dendritic cells promote potent CD8+ T-cell priming by skin delivery of live adenovirus vaccine microneedle arrays. *Proc Natl Acad Sci U S A* 110(8):3041–3046.
5. Kyte J, Doolittle RF (1982) A simple method for displaying the hydropathic character of a protein. *J Mol Biol* 157(1):105–132.
6. Grantham R (1974) Amino Acid Difference Formula to Help Explain Protein Evolution. *Science* 185(4154):862–864.
7. Zimmerman JM, Eliezer N, Simha R (1968) The characterization of amino acid sequences in proteins by statistical methods. *J Theor Biol* 21(2):170–201.
8. Assarsson E, et al. (2008) Immunomic analysis of the repertoire of T-cell specificities for influenza A virus in humans. *J Virol* 82(24):12241–51.
9. Weiskopf D, et al. (2011) Insights into HLA-restricted T cell responses in a novel mouse model of dengue virus infection point toward new implications for vaccine design. *J Immunol* 187(8):4268–79.
10. Newell EW, et al. (2013) Combinatorial tetramer staining and mass cytometry analysis facilitate T-cell epitope mapping and characterization. *Nat Biotechnol* 31(7):623–629.
11. Kotturi MF, et al. (2007) The CD8+ T-cell response to lymphocytic choriomeningitis virus involves the L antigen: uncovering new tricks for an old virus. *J Virol* 81(10):4928–4940.
12. Hudrisier D, Riond J, Mazarguil H, Gairin JE (2001) Pleiotropic effects of post-translational modifications on the fate of viral glycopeptides as cytotoxic T cell epitopes. *J Biol Chem* 276(41):38255–38260.
13. Oldstone MB, et al. (1999) Use of a high-affinity peptide that aborts MHC-restricted cytotoxic T lymphocyte activity against multiple viruses in vitro and virus-induced immunopathologic disease in vivo. *Virology* 256(2):246–257.
14. Van der Most RG, et al. (1998) Identification of Db- and Kb-restricted subdominant cytotoxic T-cell responses in lymphocytic choriomeningitis virus-infected mice. *Virology* 240(1):158–67.
15. Toes REM, et al. (1995) An Adenovirus Type 5 Early Region I B-Encoded CTL Epitope-Mediating Tumor Eradication by CTL Clones Is Down-Modulated by an Activated ras Oncogene. *J Immunol*:3396–3405.
16. Oukka M, et al. (1996) Protection Against Lethal Viral Infection by Vaccination with Nonimmunodominant Peptides. *J Immunol*:3039–3045.
17. Zanker D, Waithman J, Yewdell JW, Chen W (2013) Mixed proteasomes function to increase viral peptide diversity and broaden antiviral CD8+ T cell responses. *J Immunol* 191(1):52–59.

18. Zhong W, Reche P a, Lai C-C, Reinhold B, Reinherz EL (2003) Genome-wide characterization of a viral cytotoxic T lymphocyte epitope repertoire. *J Biol Chem* 278(46):45135–45144.
19. Elsas A Van, Burg SH Van Der, Borghi M, Mourer JS (1996) Peptide-pulsed dendritic cells induce tumoricidal cytotoxic T lymphocytes from healthy donors against stably HLA-A\*0201-binding peptides from the Melan-A / MART-1 self antigen. *Eur J Immunol* 26:1683–1689.
20. Doubrovina E, et al. (2012) Mapping of novel peptides of WT-1 and presenting HLA alleles that induce epitope-specific HLA-restricted T cells with cytotoxic activity against WT-1(+) leukemias. *Blood* 120(8):1633–1646.
21. Tsai V, et al. (1997) Identification of Subdominant CTL Epitopes of the GP100 Melanoma-associated Tumor Antigen by Primary In Vitro Immunization with Peptide-pulsed Dendritic Cells. *J Immunol* 22:1796–1802.
22. Meier A, et al. (2005) Spontaneous T-cell responses against peptides derived from the Taxol resistance-associated gene-3 (TRAG-3) protein in cancer patients. *Cancer Immunol Immunother* 54(3):219–228.
23. Zhu B, et al. (2003) Identification of HLA-A \* 0201-restricted Cytotoxic T Lymphocyte Epitope from TRAG-3 Antigen. *Clin cancer Res* 9(May):1850–1857.
24. Svane IM, et al. (2004) Vaccination with p53-peptide-pulsed dendritic cells, of patients with advanced breast cancer: report from a phase I study. *Cancer Immunol Immunother* 53(7):633–641.
25. Ito D, et al. (2007) Immunological characterization of missense mutations occurring within cytotoxic T cell-defined p53 epitopes in HLA-A\*0201+ squamous cell carcinomas of the head and neck. *Int J Cancer* 120(12):2618–2624.
